# Supplementary material for: Variation in hydration use after reinfusion of autologous stem cells in dimethyl sulfoxide (DMSO): a survey of EBMT centers
Source: Research Square preprint supplement (doi:10.21203/rs.3.rs-2624641/v1), 2023-03-16
Supplement: Supplementary file 1 [file 735a3d36455e9b80a2bca83b.docx]

Table 3: Overview of practice in EBMT centers using hydration after reinfusion autologous stem cells

Total N=54

N Missing n (%)

Reason why hydration is given:

To flush out DMSO 36 (66.7)

To protect the kidneys from DMSO 37 (68.5)

To keep patient hydrated during aplastic phase 19 (35.2)

To prevent chemotherapy-related side effects 19 (35.2)

To maintain adequate urine output to flush out dead cells 19 (35.2)

According to protocol (no specified reason) 8 (14.8)

Don’t know 1 (1.9)

Fluids used in post-hydration

NaCl 0.9% 28 (51.9)

NaCl + Glucose solution 13 (24.1)

Ringers Lactate / Hartmann’s solution 6 (11.1)

Glucose 5% 1 (1.9)

Varies 2 (3.7)

Other 4 (7.4)

Volume used in post-hydration

500 ml 6 (11.1)

1000 ml 18 (33.3)

1500 ml 4 (7.4)

2000 ml 14 (25.9)

3000 ml 4 (7.4)

Other 8 (14.8)

Choice of hydration depends on:

Hydration is for every patient the same 28 (51.9)

Comorbidities 5 (9.3)

Height and/or weight 3 (5.6)

Regimen 2 (3.7)

Age 1 (1.9)

Amounts of the stem cell pockets 1 (1.9)

No reason specified 14 (25.9)
