# Supplementary material for: Variation in hydration use after reinfusion of autologous stem cells in dimethyl sulfoxide (DMSO): a survey of EBMT centers
Source: Research Square preprint supplement (doi:10.21203/rs.3.rs-2624641/v1), 2023-03-16
Supplement: Supplementary file 2 [file 740c4c79fed52708ef906b64.docx]

Table 2: Descriptives overview respondents

Total N=64

N Missing n (%)

Role

Quality Manager 3 (4.7)

Registered Nurse 12 (18.8)

Research Nurse 2 (3.1)

Specialist Nurse 37 (57.8)

Ward Manager 6 (9.4)

Physician 2 (3.1)

Other 2 (3.1)

Years experience in haematology

0 - 2 years 1 (1.6)

2 - 5 years 2 (3.1)

5 - 10 years 15 (23.4)

10 - 15 years 14 (21.9)

> 15 years 32 (50.0)

Years experience BMT

0 - 2 years 1 (1.6)

2 - 5 years 0 (0.0)

5 - 10 years 6 (9.4)

10 - 15 years 19 (29.7)

> 15 years 38 (59.4)

Academic qualification

BSc 30 (46.9)

Diploma 15 (23.4)

MSc 15 (23.4)

PhD 4 (6.3)
