# Supplementary material for: Variation in hydration use after reinfusion of autologous stem cells in dimethyl sulfoxide (DMSO): a survey of EBMT centers
Source: Research Square preprint supplement (doi:10.21203/rs.3.rs-2624641/v1), 2023-03-16
Supplement: Supplementary file 3 [file 8742fcc3210d5fcdd1f25557.docx]

Table 1: Descriptives overview centres

Total N=64

N Missing n (%)

Country

Belgium 3 (4.7)

Chile 1 (1.6)

Czech Republic 1 (1.6)

Denmark 2 (3.1)

Finland 1 (1.6)

France 1 (1.6)

Germany 3 (4.7)

Iceland 1 (1.6)

Italy 6 (9.4)

Lebanon 1 (1.6)

Netherlands 4 (6.2)

Pakistan 2 (3.1)

Poland 2 (3.1)

Saudi Arabia 1 (1.6)

Spain 4 (6.2)

Sweden 2 (3.1)

Switzerland 3 (4.7)

Turkey 5 (7.8)

United Kingdom 21 (32.8)

JACIE accredited

Yes 47 (73.4)

No 12 (18.8)

In process/Pending 5 (7.8)

Academic centre

Yes 47 (73.4)

No 17 (26.6)

Type of patients

Children (0 - 18 years) 0 (0.0)

Adults (> 18 years) 58 (90.6)

Children and adults 6 (9.4)

Type of disease

Malignant haematology 16 (25.0)

Non-malignant haematology 0 (0.0)

Malignant and non-malignant haematology 48 (75.0)

Type of transplantion

Allogenic 0 (0.0)

Autologous 20 (31.2)

Allogenic and autologous 44 (68.8)

Number of autologous transplants

0-20 10 (15.6)

21-50 28 (43.8)

>50 22 (34.4)

Don’t know 4 (6.3)
